# Supplementary material for: Defining the copper binding aptamotif and aptamer integrated recovery platform (AIRP)
Source: Royal Society of Chemistry journal article supplement (doi:10.1039/c6nr09408b), 2017-01-01
Supplement: c6nr09408b1.pdf [file c6nr09408b1.pdf]

## ***Supporting information***

**Title:** Defining the copper binding aptamotif and Aptamer Integrated Recovery Platform (AIRP)

Simranjeet Singh Sekhon<sup>1</sup>, Sang-Hee Lee<sup>1</sup>, Kyeong-Ah Lee<sup>1</sup>, Jiho Min<sup>2</sup>, Byung-Tae Lee<sup>3</sup>, Kyoung-Woong Kim<sup>3</sup>, Ji-Young Ahn<sup>1, †</sup> and Yang-Hoon Kim<sup>1,\*</sup>

<sup>1</sup> School of Biological Sciences, Chungbuk National University, 1 Chungdae-Ro, Seowon-Gu, Cheongju 28644, South Korea

<sup>2</sup> Department of Bioprocess Engineering, Chonbuk National University, 567 Baekje-daero, Deokjin-Gu Jeonju 54896, South Korea

<sup>3</sup> School of Earth Sciences and Environmental Engineering, Gwangju Institute Sciences and Technology (GIST), 123 Cheomdan-gwagiro, 500-712, South Korea

**Keyword:** copper binding aptamotif, Aptamer Integrated Retrieval Platform (AIRP), copper retrieval, reusable copper binding aptamer, mine drainage

\*, †Correspondence and requests for materials should be addressed to Y.-H. K

([kyh@chungbuk.ac.kr](mailto:kyh@chungbuk.ac.kr)) and J.-Y. A ([jyahn@chungbuk.ac.kr](mailto:jyahn@chungbuk.ac.kr))

### **Figures and Table**

**Figure S1.** Copper recovery experimental steps

**Figure S2.** The binding affinity test by SPR

**Table S1.** Sequence analysis of the copper-aptamer candidates and their copper-binding affinities, as determined from the direct coupling SPR assay.

**Table S2.** The binding affinity test of Cu-A2

**Table S3.** The binding affinity values of Cu-A1, Cu-A2, Cu-A3, and Cu-A4

**Figure S1. Copper recovery experimental steps**

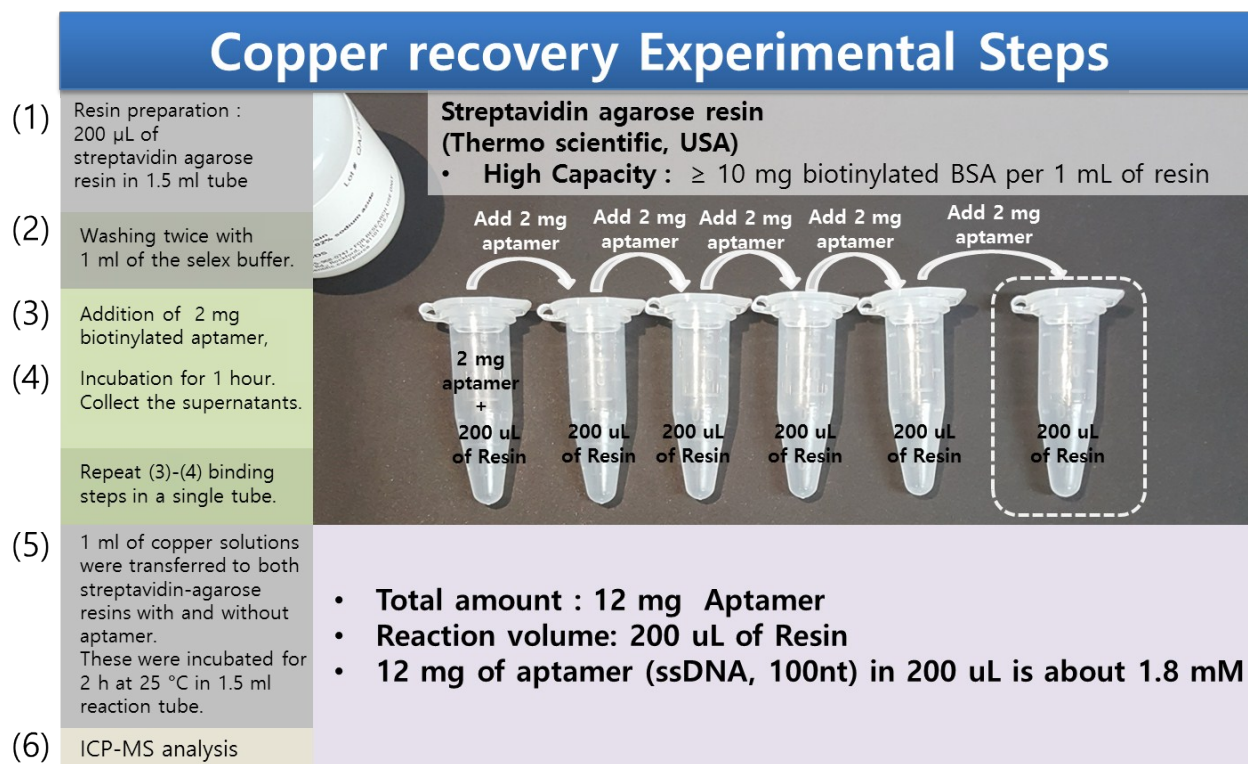

### Experimental steps

#### (1) Resin preparation:

- Gently mix the streptavidin agarose resin (Thermo scientific, USA)
- Using wide-mouth yellow pipette-tip, transfer 200 µL of agarose resin slurry to 1.5 mL microtubes.

#### (2) Remove supernatant. The resin was then washed twice with 1 ml of the selex buffer.

#### (3) Aptamer preparation in 1.5 ml reaction tube:

- 2 mg of the biotinylated aptamer in 400 µL of the selex buffer
- Applied drop-by-drop on to the streptavidin agarose resin
- Incubated for 1 h on thermomixer (Eppendorf, Germany) at 1300 rpm.

#### (4) Correct the supernatants by extracting supernatant and repeat aptamer binding in a single tube.

- (5) After washing, 1 ml of copper solutions were transferred to both streptavidin-agarose resins with and without aptamer and incubated for 2 h at 25 °C in 1.5 ml reaction tube (final concentrations, 1, 3, 5, 7, 10, 30, 50, 70, 100, 150 and 300 mg/L).
- (6) After centrifugation at 13000 rpm for 1 min, the copper content in supernatant fraction was measured by Inductively Coupled Plasma-Mass Spectrometry (ICP-MS, Agilent 7500ce, Agilent, USA).

**Figure S2. The binding affinity test by SPR**

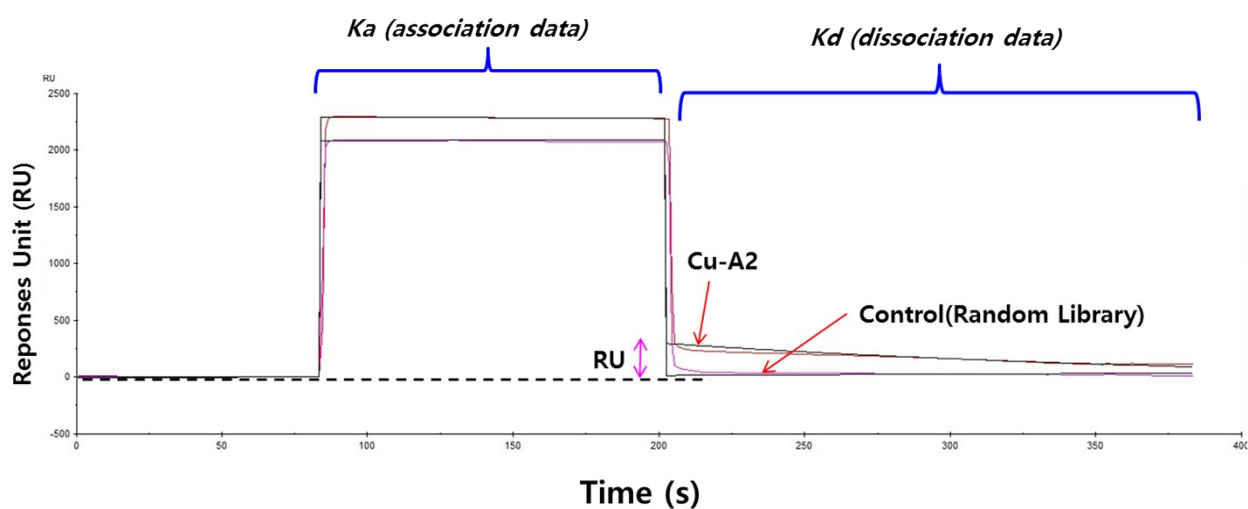

The binding affinity of Cu-A2 was analyzed by SPR using Biacore 3000 Instrument. All data sets were listed in **Supporting information Table 2**. Random initial library was also introduced as a control.

**Table S1.** Sequence analysis of the copper-aptamer candidates and their copper-binding affinities, as determined from the direct coupling SPR assay.

| Name   | Aptamer sequences (N40)                   | Affinity<br>( $K_D$ , M)         | Random<br>sequences size<br>(bp) | Identical<br>sequences |
|--------|-------------------------------------------|----------------------------------|----------------------------------|------------------------|
| Cu_A1  | GGTGTGACTGAGTAACTCACTCCAACCCCTGGAGTGGGAT  | $7.88 \pm 1.41 \times 10^{-11}$  | 40                               | 2                      |
| Cu_A2  | CCCAGGCTTGGATAGCACATTCATGGCAGCGTTCTTTACG  | $1.83 \pm 4.503 \times 10^{-11}$ | 40                               | 6                      |
| Cu_A3  | ATTTGACCATCGTCTCCGGCTCACGGAATTATCAGCAGCG  | $8.95 \pm 2.5 \times 10^{-10}$   | 40                               | 3                      |
| Cu_A4  | TTCTTAGGGAAGTAATCACGGAAAACCGTCTCCGTTCTCA  | $1.73 \pm 1.03 \times 10^{-10}$  | 40                               | 1                      |
| Cu_A5  | ACCCACCGTACTAGTGACGGATAACAATGGCCGCCTTGTCG | $8.16 \pm 1.93 \times 10^{-8}$   | 40                               | 1                      |
| Cu_A6  | CCAGGCAAGAAGTAATCACGGAAAACCGTCTCCGTTCTCA  | $8.01 \pm 0.11 \times 10^{-8}$   | 40                               | 1                      |
| Cu_A7  | AACGTTTAGCATTAGAGTCATTGCGATGATCCACGTTG    | $1.10 \pm 0.02 \times 10^{-8}$   | 40                               | 1                      |
| Cu_A8  | CGGGGCACTGTTGAGGGTCTGGCACGGTCACAAGCTAG    | $9.42 \pm 1.18 \times 10^{-7}$   | 38                               | 1                      |
| Cu_A9  | AAGAGGCTTGAAGACGCCATCATGATGAGGAACTTGATTA  | $7.02 \pm 0.08 \times 10^{-8}$   | 40                               | 1                      |
| Cu_A10 | AGGACAATCAGTAACGGCGAGCCACATAACGTTTCGAGTG  | $1.09 \pm 1.77 \times 10^{-8}$   | 39                               | 1                      |
| Cu_A11 | CGTATTCCGAATATTGGGTCACCTCATGTGTCAGTCGCCTG | $1.39 \pm 1.52 \times 10^{-8}$   | 40                               | 1                      |

**Table S2.** The binding affinity test of Cu-A2

| <b>Cu-A2</b>         | <b>K<sub>a</sub> (1/Ms)</b> | <b>K<sub>d</sub> (1/s)</b> | <b>K<sub>D</sub> (M)</b> | <b>RU</b>  |
|----------------------|-----------------------------|----------------------------|--------------------------|------------|
| 1 <sup>st</sup> Test | 7.01E+07                    | 1.33E-03                   | 1.90E-11                 | 305        |
| 2 <sup>nd</sup> Test | 8.04E+07                    | 2.67E-03                   | 3.32E-11                 | 305        |
| 3 <sup>rd</sup> Test | 5.89E+05                    | 6.10E-06                   | 1.04E-11                 | 119        |
| 4 <sup>th</sup> Test | 7.01E+07                    | 1.49E-03                   | 2.13E-11                 | 305        |
| 5 <sup>th</sup> Test | 7.89E+05                    | 6.10E-06                   | 7.73E-12                 | 119        |
| <b>Average</b>       | <b>3.38E+07</b>             | <b>2.62E-03</b>            | <b>1.83E-11</b>          | <b>213</b> |

**Table S3.** The binding affinity values of Cu-A1, Cu-A2, Cu-A3, and Cu-A4

| <b>Name</b> | <b>K<sub>D</sub> (M)</b> | <b>SD (M)</b> |
|-------------|--------------------------|---------------|
| Cu-A1 Nat   | 7.88E-11                 | ±1.4176E-11   |
| Cu-A1 Mut   | 7.65E-10                 | ±1.3429E-10   |
| Cu-A1 Del   | 3.97E-09                 | ±1.6411E-9    |

| <b>Name</b> | <b>K<sub>D</sub> (M)</b> | <b>SD (M)</b> |
|-------------|--------------------------|---------------|
| Cu-A2 Nat   | 1.83E-11                 | ±1.3304E-11   |
| Cu-A2 Mut   | 8.34E-09                 | ±1.5194E-9    |
| Cu-A2 Del   | 4.84E-08                 | ±1.1768E-8    |

| <b>Name</b> | <b>K<sub>D</sub> (M)</b> | <b>SD (M)</b> |
|-------------|--------------------------|---------------|
| Cu-A3 Nat   | 8.95E-10                 | ±2.5202E-10   |
| Cu-A3 Mut   | 8.5E-11                  | ±5.0082E-11   |
| Cu-A3 Del   | 1.69E-08                 | ±1.1460E-8    |

| <b>Name</b> | <b>K<sub>D</sub> (M)</b> | <b>SD (M)</b> |
|-------------|--------------------------|---------------|
| Cu-A4 Nat   | 1.73E-10                 | ±1.0279E-10   |
| Cu-A4 Mut   | 7.73E-11                 | ±1.3405E-11   |
| Cu-A4 Del   | 1.92E-10                 | ±2.1575E-10   |
